# Supplementary material for: Magnetically actuated swimming and rolling erythrocyte-based biohybrid micromotors
Source: Royal Society of Chemistry journal article supplement (doi:10.1039/d3ra05844a), 2023-01-01
Supplement: d3ra05844a2.pdf [file d3ra05844a2.pdf]

## Supporting Information

### Magnetically Actuated Swimming and Rolling Erythrocyte-based Biohybrid Micromotors

Qi Wang,<sup>\*ab</sup> Sophie Jermyn,<sup>ab</sup> David Quashie Jr.,<sup>ab</sup> Elizabeth Gatti,<sup>bc</sup> Jaideep Katuri,<sup>ab</sup> and Jamel Ali<sup>ab</sup>

<sup>a)</sup> Department of Chemical and Biomedical Engineering, FAMU-FSU College of Engineering, Tallahassee, Florida 32310, USA.

<sup>b)</sup> National High Magnetic Field Laboratory, Tallahassee, Florida 32310, USA.

<sup>c)</sup> Department of Biomedical Engineering, Vanderbilt University College of Engineering, Nashville, Tennessee 37235, USA.

(\*Email: jali@eng.famu.fsu.edu)

**Supplementary Video 1:** The RBCs and RBCBs with (specific MNP binding) and without (non-specific MNP binding) biotin in the absence and presence of an external rotating magnetic field. The external field strength is 10mT rotating in the x-y plane, 4Hz.

**Supplementary Video 2:** Magnetically actuated rolling of red blood cell micromotors (RBCMs) in a 1X PBS solution near an underling substrate. The external field strength is 10mT rotating in the y-z plane.

**Supplementary Video 3:** Magnetically actuated bulk swimming of red blood cell micromotors (RBCMs) in a 1X PBS solution ~50  $\mu\text{m}$  away from a substrate. The external field strength is 10mT rotating in the y-z plane.

**Supplementary Video 4:** Demonstration RBCB micromotor magnetic stability under sustained external field actuation. The external magnetic field strength is 10mT, 4Hz. First, the external field is set to rotate in the y-z plane for 50 sec, resulting in RBCBM rolling near the substrate. Then, the field is set to rotate in the x-y plane for 5min. Finally, magnetic field is set to again rotate in the y-z plane for 50 sec.

**Supplementary Video 5:** Open loop control of RBCBM rolling near interface under a 10mT 4Hz magnetic field.

**Supplementary Video 6:** Open loop control of RBCBM swimming in bulk fluid under 10mT, 4Hz magnetic field.

**Supplementary Figure:**

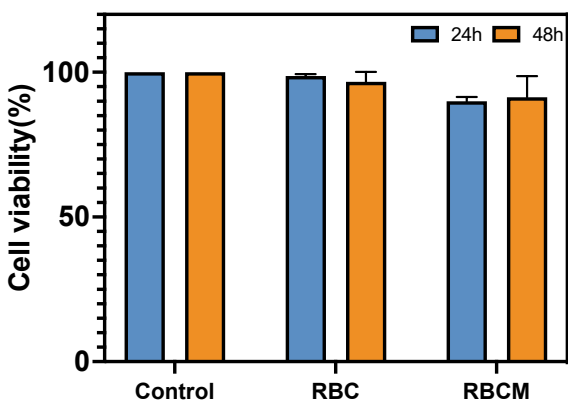

To investigate the *in vitro* biocompatibility of RBCB micromotors, a set of MTT experiments were performed. The results indicate that HEK-293 cell viability was above 90% in all groups, including HEK-293 cells co-cultured with RBCs or RBCBs for 24 and 72 hrs.
